# Supplementary material
Source: PubMed Central journal article supplement (PMC5732888)
Supplement: NIHMS909813-supplement-2.pdf [file NIHMS909813-supplement-2.pdf]

## Supplementary Table 2. Demographics

|                            | <b>N</b> | <b>%</b> |
|----------------------------|----------|----------|
| <b>Total # of Patients</b> | 24       | 100.00   |
| <b>Gender</b>              |          |          |
| F                          | 12       | 50.00    |
| M                          | 12       | 50.00    |
| <b>Race</b>                |          |          |
| White                      | 19       | 79.17    |
| Black or African American  | 5        | 20.83    |
| <b>Ethnicity</b>           |          |          |
| NOT HISPANIC OR LATINO     | 19       | 79.17    |
| NOT REPORTED               | 4        | 16.67    |
| UNKNOWN                    | 1        | 4.17     |
| <b>ECOG Status</b>         |          |          |
| 0                          | 19       | 79.17    |
| 1                          | 5        | 20.83    |
| <b>Histology</b>           |          |          |
| ADENOCARCINOMA             | 15       | 62.50    |
| SQUAMOUS CELL CARCINOMA    | 9        | 37.50    |
| <b>N Stage</b>             |          |          |
| N0                         | 2        | 8.33     |
| N1                         | 4        | 16.67    |
| N2                         | 18       | 75.00    |
| <b>T stage</b>             |          |          |
| T1a                        | 1        | 4.17     |
| T1b                        | 5        | 20.83    |
| T2                         | 3        | 12.50    |
| T2a                        | 7        | 29.17    |
| T2b                        | 3        | 12.50    |
| T3                         | 5        | 20.83    |
| <b>M Stage</b>             |          |          |
| M0                         | 24       | 100.00   |

|                                     | <b>N</b> | <b>%</b> |
|-------------------------------------|----------|----------|
| <b>Stage at Diagnosis</b>           |          |          |
| IIA                                 | 3        | 12.50    |
| IIB                                 | 2        | 8.33     |
| IIIA                                | 19       | 79.17    |
| <b>Prior Biopsy</b>                 |          |          |
| No                                  | 17       | 70.83    |
| Yes                                 | 7        | 29.17    |
| <b>Prior Bronchoscopy</b>           |          |          |
| No                                  | 1        | 4.17     |
| Yes                                 | 23       | 95.83    |
| <b>Prior Fine-Needle Aspiration</b> |          |          |
| No                                  | 21       | 87.50    |
| Yes                                 | 3        | 12.50    |
| <b>Prior Mediastinoscopy</b>        |          |          |
| No                                  | 14       | 58.33    |
| Yes                                 | 10       | 41.67    |
| <b>Prior Thoracoscopy</b>           |          |          |
| No                                  | 23       | 95.83    |
| Yes                                 | 1        | 4.17     |
| <b>Other Prior Procedure</b>        |          |          |
| No                                  | 20       | 83.33    |
| Yes                                 | 4        | 16.67    |
| <b>Biopsy Location</b>              |          |          |
| 4R LYMPH NODE                       | 1        | 4.17     |
| L HILUM                             | 1        | 4.17     |
| LLL                                 | 3        | 12.50    |
| LUL                                 | 3        | 12.50    |
| LYMPH NODE, LEVEL 7                 | 1        | 4.17     |
| R HILUM                             | 1        | 4.17     |
| RLL                                 | 1        | 4.17     |
| RML                                 | 2        | 8.33     |
| RUL                                 | 11       | 45.83    |

|                          | <b>N</b> | <b>%</b> |
|--------------------------|----------|----------|
| <b>Chemotherapy Used</b> |          |          |
| CARBOPLATIN              | 22       | 91.67    |
| CISPLATIN                | 2        | 8.33     |

|            | <b>N</b> | <b>Mean</b> | <b>StdDev</b> | <b>Median</b> | <b>Min</b> | <b>Max</b> |
|------------|----------|-------------|---------------|---------------|------------|------------|
| <b>Age</b> | 24       | 65.26       | 8.04          | 65.69         | 49.77      | 76.27      |
