# Supplementary material
Source: PubMed Central journal article supplement (PMC5732888)
Supplement: NIHMS909813-supplement-3.pdf [file NIHMS909813-supplement-3.pdf]

**Supplementary Table 3. Signed-Rank Tests of V3-V2 Difference**

| <b>Marker Being Tested</b> | <b>Median V3-V2 Difference</b> | <b>Minimum</b> | <b>Maximum</b> | <b>P-value for Signed-Rank of V3-V2 Difference</b> |
|----------------------------|--------------------------------|----------------|----------------|----------------------------------------------------|
| HLA-DR-/Lin-               | 4.350                          | -12.40         | 17.30          | 0.0616                                             |
| MDSC                       | -0.862                         | -23.28         | 7.70           | 0.0205                                             |
| CD3+                       | 8.350                          | -5.70          | 26.00          | <.0001                                             |
| CD4+                       | -0.100                         | -16.50         | 17.70          | 0.9669                                             |
| Tregs                      | 1.045                          | -3.65          | 5.26           | 0.0123                                             |
| CTLA-4+Tregs               | 2.900                          | -26.50         | 15.30          | 0.1012                                             |
| CD4+CD28+                  | 2.250                          | -0.60          | 19.50          | <.0001                                             |
| CD4+CD28+ICOS+             | 14.345                         | 0.32           | 26.40          | <.0001                                             |
| CD4+CD28-                  | -2.190                         | -19.60         | 0.62           | <.0001                                             |
| CD4+HLA-DR+                | 7.405                          | -0.28          | 16.08          | <.0001                                             |
| CD4+CTLA-4+                | 12.750                         | -1.84          | 26.70          | <.0001                                             |
| CD4+PD-1+                  | 2.400                          | -0.65          | 10.00          | <.0001                                             |
| CD4+ICOS+                  | 14.075                         | 0.30           | 26.42          | <.0001                                             |
| CD4-                       | 0.100                          | -17.70         | 16.50          | 0.9779                                             |
| CD4-CD28+                  | 5.400                          | -10.60         | 21.20          | 0.0732                                             |
| CD4-CD28+ICOS+             | 7.555                          | 2.40           | 21.80          | <.0001                                             |
| CD4-CD28-                  | -5.300                         | -20.70         | 10.62          | 0.0661                                             |
| CD4-HLA-DR+                | 19.565                         | -9.30          | 42.90          | <.0001                                             |
| CD4-CTLA-4+                | 3.920                          | -2.54          | 9.13           | <.0001                                             |
| CD4-PD-1+                  | 0.980                          | -3.76          | 11.30          | 0.3207                                             |
| CD4-ICOS+                  | 4.910                          | -1.25          | 18.50          | <.0001                                             |
