# Supplementary material
Source: PubMed Central journal article supplement (PMC5732888)

# Supplementary Figure 1.

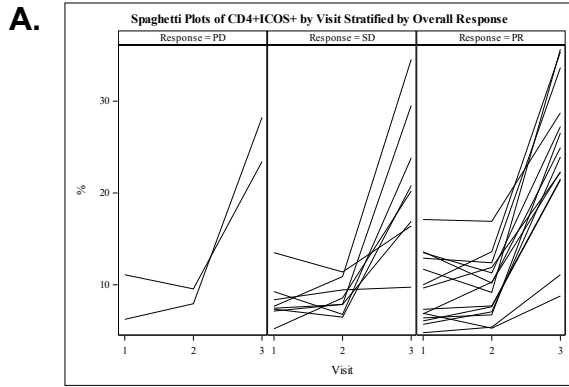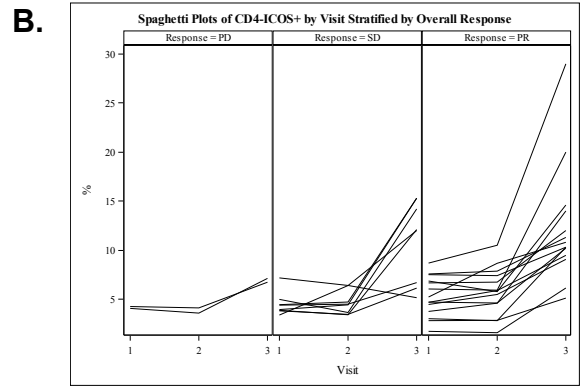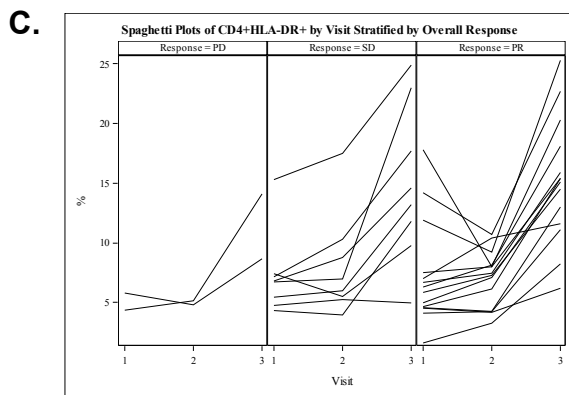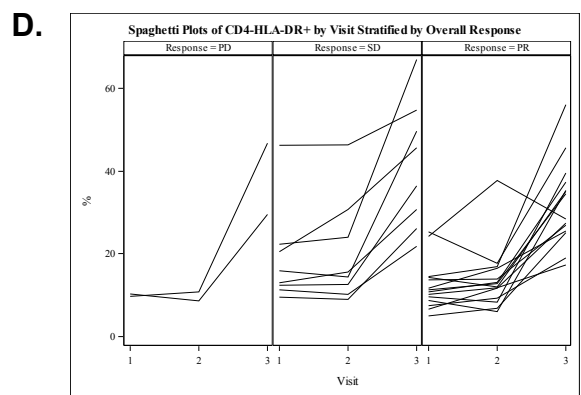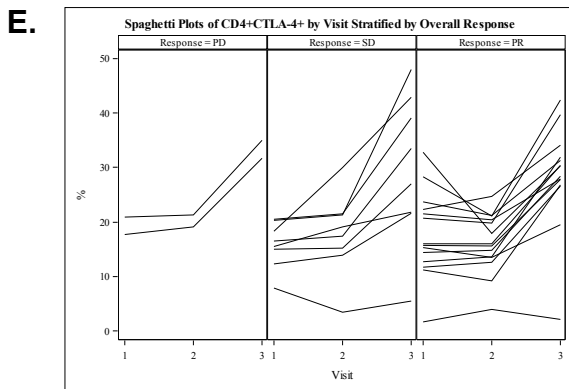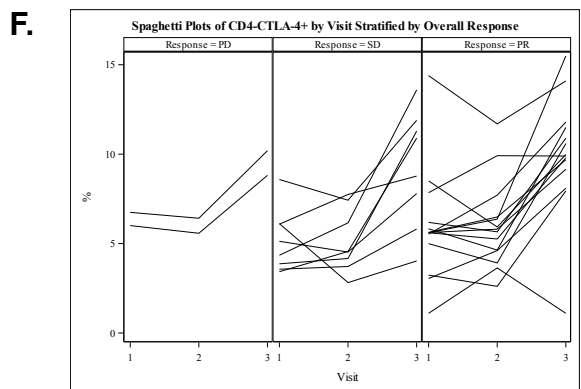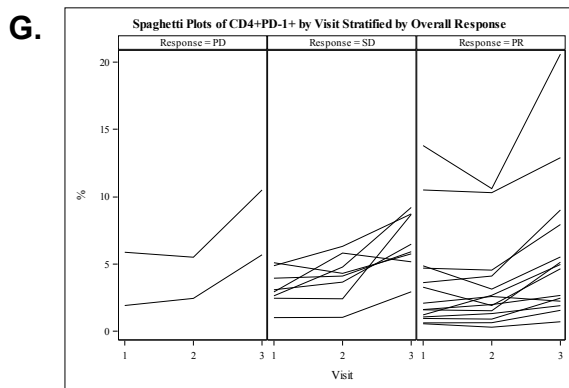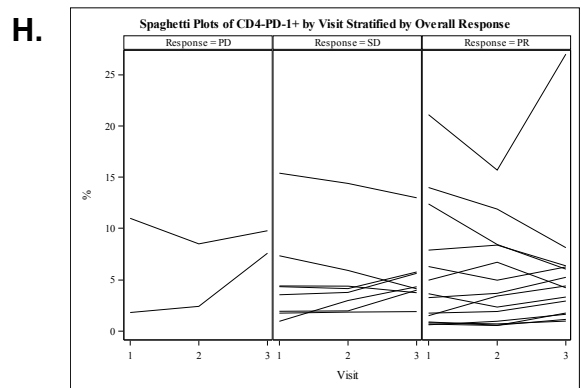

Supplement: NIHMS909813-supplement-4.pdf [file NIHMS909813-supplement-4.pdf]

Supplementary Figure 2.

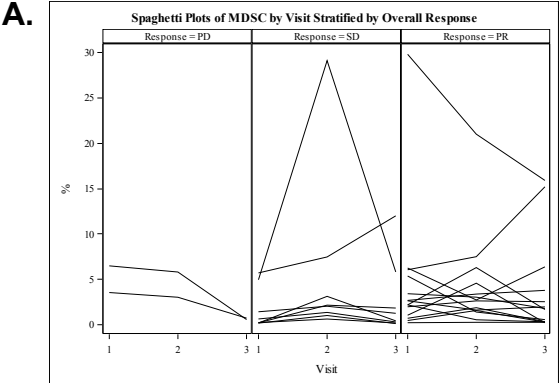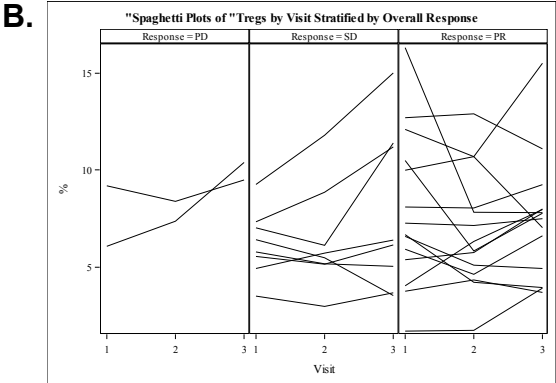

Supplement: NIHMS909813-supplement-5.pdf [file NIHMS909813-supplement-5.pdf]
